# Supplementary material
Source: ML conference proceedings conference paper supplement (https://openreview.net/forum?id=d_rr1bOimv)
Supplement: supplementary_material [file attachment]

| Case                       | 1                                                                                                                                                                                                                                                                                                                                                                                                                                                                                       | 2                                                                                                                                                                                                                                                                                                                                                                                                                                                                                               | 3                                                                                                                                                                                                                                                                                                                                                                                                                                                                                           |                                                                                                                                                                                                                                                                                                                                                                                                                                                                                               | 4                                                                                                                                                                                                                                                                                                                                                                                                                                                                                                     |                                                                                                                                                                                                                                                                                                                                                                                                                                                                                                                               |
|----------------------------|-----------------------------------------------------------------------------------------------------------------------------------------------------------------------------------------------------------------------------------------------------------------------------------------------------------------------------------------------------------------------------------------------------------------------------------------------------------------------------------------|-------------------------------------------------------------------------------------------------------------------------------------------------------------------------------------------------------------------------------------------------------------------------------------------------------------------------------------------------------------------------------------------------------------------------------------------------------------------------------------------------|---------------------------------------------------------------------------------------------------------------------------------------------------------------------------------------------------------------------------------------------------------------------------------------------------------------------------------------------------------------------------------------------------------------------------------------------------------------------------------------------|-----------------------------------------------------------------------------------------------------------------------------------------------------------------------------------------------------------------------------------------------------------------------------------------------------------------------------------------------------------------------------------------------------------------------------------------------------------------------------------------------|-------------------------------------------------------------------------------------------------------------------------------------------------------------------------------------------------------------------------------------------------------------------------------------------------------------------------------------------------------------------------------------------------------------------------------------------------------------------------------------------------------|-------------------------------------------------------------------------------------------------------------------------------------------------------------------------------------------------------------------------------------------------------------------------------------------------------------------------------------------------------------------------------------------------------------------------------------------------------------------------------------------------------------------------------|
| Visual Information         |                                                                                                                                                                                                                                                                                                                                                                                                         |                                                                                                                                                                                                                                                                                                                                                                                                                |                                                                                                                                                                                                                                                                                                                                                                                                           |                                                                                                                                                                                                                                                                                                                                                                                                                                                                                               |                                                                                                                                                                                                                                                                                                                                                                                                                     |                                                                                                                                                                                                                                                                                                                                                                                                                                                                                                                               |
| Textual Information        | Morgan at the 2010 San Diego Comic-Con International.                                                                                                                                                                                                                                                                                                                                                                                                                                   | Carroll after winning election as lieutenant governor in 2010.                                                                                                                                                                                                                                                                                                                                                                                                                                  | Meulens , left, and Robert Enhoorn, both former Yankees, have led the Dutch to the final four of the World Baseball Classic.                                                                                                                                                                                                                                                                                                                                                                |                                                                                                                                                                                                                                                                                                                                                                                                                                                                                               | Marzouki with U.S Secretary of State John Kerry, Carthage Palace, 2014.                                                                                                                                                                                                                                                                                                                                                                                                                               |                                                                                                                                                                                                                                                                                                                                                                                                                                                                                                                               |
| Mention                    | Morgan                                                                                                                                                                                                                                                                                                                                                                                                                                                                                  | Carroll                                                                                                                                                                                                                                                                                                                                                                                                                                                                                         | Meulens                                                                                                                                                                                                                                                                                                                                                                                                                                                                                     | Robert Enhoorn                                                                                                                                                                                                                                                                                                                                                                                                                                                                                | John Kerry                                                                                                                                                                                                                                                                                                                                                                                                                                                                                            | Marzouki                                                                                                                                                                                                                                                                                                                                                                                                                                                                                                                      |
| Candidate Entities (Top-3) |  <p><b>1. Colin Morgan</b><br/>(actor, film actor. 1986)<br/>9.9e-1</p>  <p><b>2. Jeffrey Dean Morgan</b><br/>(actor, film actor. 1966)<br/>8.1e-3</p>  <p><b>3. Megan Fox</b><br/>(actor, film actor. 1986)<br/>1.9e-3<br/>...</p> |  <p><b>1. Morgan Carroll</b><br/>(politician. 1971)<br/>9.9e-1</p>  <p><b>2. Joe Barton</b><br/>(politician, engineer. 1949)<br/>9.5e-1<br/>...</p>  <p><b>10. Jennifer Carroll</b><br/>(politician, military officer. 1986)<br/>1.7e-1</p> |  <p><b>1. Hensley Meulens</b><br/>(baseball player. 1967)<br/>0.9 → 1.7</p>  <p><b>2. Gil Meche</b><br/>(baseball player. 1978)<br/>0.2 → 0.7</p>  <p><b>3. Cole Hamels</b><br/>(baseball player. 1983)<br/>0.1 → 0.6<br/>...</p> |  <p><b>1. Robert Eenhoorn</b><br/>(baseball player. 1968)<br/>0.9 → 1.7</p>  <p><b>2. Roger Clemens</b><br/>(baseball player. 1962)<br/>0.8 → 1.5</p>  <p><b>3. Rod Thorn</b><br/>(baseball player. 1941)<br/>0.1 → 0.5<br/>...</p> |  <p><b>1. John Kerry</b><br/>(politician, lawyer. 1943)<br/>1.0 → 1.7</p>  <p><b>2. John W. deGravelles</b><br/>(judge, lawyer. 1949)<br/>3.7e-5 → 3.7e-5</p>  <p><b>3. John Key</b><br/>(politician. 1961)<br/>3.3e-6 → 3.3e-6<br/>...</p> |  <p><b>1. Masaaki Yamazaki</b><br/>(politician. 1942)<br/>0.5 → 1.2</p>  <p><b>2. Vladimir Lukin</b><br/>(politician, diplomat. 1937)<br/>4.1e-3 → 0.5<br/>...</p>  <p><b>*. Moncef Marzouki</b><br/>(politician, physician. 1945)<br/>9.7e-5 → 0.5<br/>(6) (3)</p> |
